# Supplementary material for: Chronic lung diseases are associated with gene expression programs favoring SARS-CoV-2 entry and severity
Source: PubMed Central journal article supplement (PMC8280215; doi:10.1038/s41467-021-24467-0), 2021-07-14
Supplement: 41467_2021_24467_MOESM1_ESM.pdf [file 41467_2021_24467_MOESM1_ESM.pdf]

## **Chronic lung diseases are associated with gene expression programs favoring SARS-CoV-2 entry and severity**

*Linh T. Bui<sup>1†</sup>, Nichelle I. Winters<sup>2†</sup>, Mei-I Chung<sup>1</sup>, Chitra Joseph<sup>3</sup>, Austin J. Gutierrez<sup>1</sup>, Arun C. Habermann<sup>2</sup>, Taylor S. Adams<sup>4</sup>, Jonas C. Schupp<sup>4</sup>, Sergio Poli<sup>5</sup>, Lance M. Peter<sup>1</sup>, Chase J. Taylor<sup>2</sup>, Jessica B. Blackburn<sup>2</sup>, Bradley W. Richmond<sup>2,6</sup>, Andrew G. Nicholson<sup>7,8</sup>, Doris Rassl<sup>9</sup>, William A. Wallace<sup>10,11</sup>, Ivan O. Rosas<sup>12</sup>, R. Gisli Jenkins<sup>3</sup>, Naftali Kaminski<sup>4</sup>, Jonathan A. Kropski<sup>2,6,13 ††</sup>, Nicholas E. Banovich<sup>1††\*</sup> and the Human Cell Atlas Lung Biological Network*

**Online Data Supplement**  
Supplementary Tables 1-5  
Supplementary Dataset 1-4  
Supplementary Figures 1-12

## SUPPLEMENTARY TABLES

**Supplementary Table 1:**

a. Summary of sample processing method of the samples used in the study

| <b>Dataset/Ref.</b>                                | <b>Tissue Source</b>                         | <b>Sampling</b>                                                                         | <b>Digest Method</b>                                                   |
|----------------------------------------------------|----------------------------------------------|-----------------------------------------------------------------------------------------|------------------------------------------------------------------------|
| Northwestern<br>(Reyffman <i>et al.</i> ,<br>2019) | Explanted lung,<br>1 bronchoscopic<br>biopsy | Peripheral biopsy<br>representative of<br>whole lung                                    | Collagenase D, DNase I-><br>mechanical mincing                         |
| Pittsburgh<br>(Morse <i>et al.</i> ,<br>2019)      | Explanted lung                               | Apical and basal<br>biopsy                                                              | Collagenase A, DNase->Miltenyi<br>GentleMACS Octodissociator           |
| VUMC/TGen<br>(Habermann <i>et al.</i> , 2020)      | Explanted lung                               | Apical and basal<br>peripheral biopsy                                                   | Collagenase I, Dispase II -><br>Miltenyi GentleMACS<br>Octodissociator |
| Yale/BWH<br>(Adams <i>et al.</i> ,<br>2020)        | Explanted lung                               | Apicobasal<br>longitudinal<br>biopsy, exclusion<br>of large<br>airways/blood<br>vessels | Elastase, DNase, liberase-><br>mechanical mincing                      |

b. Number of samples used in the study

| <b>Dataset</b> | <b>Control</b> | <b>COPD</b> | <b>IPF</b> | <b>Other ILD</b> |
|----------------|----------------|-------------|------------|------------------|
| Northwestern   | 9              | 0           | 4          | 4                |
| Pittsburgh     | 9              | 0           | 8          | 0                |
| VUMC/TGen      | 22             | 7           | 25         | 15               |
| Yale/BWH       | 38             | 24          | 45         | 0                |
| <b>Total</b>   | <b>78</b>      | <b>31</b>   | <b>82</b>  | <b>19</b>        |

**Supplementary Table 2: Demographics of lung donors used for scRNA-seq**

|               | <b>Control</b> | <b>COPD</b> | <b>IPF</b>    | <b>Other-ILD</b> |
|---------------|----------------|-------------|---------------|------------------|
|               | n=78           | n=31        | n=82          | n=19             |
| Age           | 44.23 [17-80]  | 62 [55-73]  | 64.87 [43-78] | 54.95 [37-70]    |
| Ever_smoke    | 29 (37.2%)     | 28 (90.3%)  | 52 (63.4%)    | 8 (42%)          |
| Gender (Male) | 44 (56.4%)     | 19 (61.3%)  | 59 (71.9%)    | 10 (52.6%)       |
| Ethnicity     |                |             |               |                  |
| European      | 54 (69.2%)     | 31 (100%)   | 60 (73.2%)    | 12 (63.2%)       |
| African       | 8 (10.2%)      | -           | 3 (3.7%)      | 3 (15.8%)        |
| Hispanic      | 1 (1.3%)       | -           | 4 (4.9%)      | -                |
| Asian         | 2 (2.6%)       | -           | 1 (1.2%)      | -                |
| Other/Unknown | 13 (16.7%)     | -           | 14 (17%)      | 4 (21%)          |

**Supplementary Table 3a: Cell proportion for each cell type in each dataset or diagnosis group**

| Cell type                   | Cell proportion (%) |               |                |                |                |               |                |               |  |
|-----------------------------|---------------------|---------------|----------------|----------------|----------------|---------------|----------------|---------------|--|
|                             | Dataset             |               |                |                | Diagnosis      |               |                |               |  |
|                             | Northwestern        | Pittsburg     | VUMC/TGen      | Yale/BWH       | Control        | COPD          | IPF            | Other-ILD     |  |
| AT1                         | 0.73                | 0.35          | 0.80           | 0.22           | 0.73           | 1.28          | 0.10           | 0.55          |  |
| AT2                         | 33.17               | 2.95          | 10.95          | 1.82           | 16.80          | 4.65          | 3.86           | 11.28         |  |
| B Cells                     | 0.61                | 0.51          | 1.03           | 2.42           | 0.75           | 2.77          | 2.00           | 0.79          |  |
| Basal                       | 1.43                | 2.30          | 1.61           | 0.28           | 0.18           | 0.22          | 1.72           | 1.63          |  |
| CD4 T Cells                 | 2.76                | 4.22          | 3.92           | 3.37           | 2.53           | 6.83          | 3.60           | 2.62          |  |
| CD8 T Cells                 | 0.03                | 0.24          | 5.36           | 7.53           | 4.51           | 11.60         | 5.14           | 2.46          |  |
| cDCs                        | 0.58                | 0.92          | 3.42           | 2.75           | 1.66           | 3.50          | 2.85           | 3.62          |  |
| Ciliated Cells              | 4.84                | 3.86          | 10.46          | 3.39           | 3.22           | 5.69          | 8.85           | 6.11          |  |
| Fibroblasts                 | 0.30                | 4.92          | 1.59           | 1.49           | 0.75           | 1.27          | 2.29           | 1.60          |  |
| HAS1 High Fibroblasts       | 0.03                | 0.46          | 0.21           | 0.11           | 0.12           | 0.07          | 0.22           | 0.16          |  |
| KRT5-/KRT17+                | 0.09                | 0.27          | 0.79           | 0.18           | 0.04           | 0.17          | 0.67           | 0.71          |  |
| Lymphatic Endothelial Cells | 0.31                | 1.51          | 0.90           | 0.64           | 0.89           | 0.69          | 0.66           | 0.80          |  |
| Macrophages                 | 44.12               | 54.31         | 36.52          | 67.23          | 59.05          | 47.37         | 49.61          | 47.25         |  |
| Mast Cells                  | 0.33                | 1.25          | 0.71           | 0.36           | 0.34           | 0.86          | 0.63           | 0.45          |  |
| Mesothelial                 | 0.09                | 0.09          | 0.33           | 0.16           | 0.06           | 0.37          | 0.23           | 0.38          |  |
| Monocytes                   | 0.00                | 0.03          | 0.52           | 0.01           | 0.21           | 0.15          | 0.16           | 0.49          |  |
| MUC5AC+                     | 0.05                | 0.29          | 0.51           | 0.04           | 0.09           | 0.56          | 0.26           | 0.20          |  |
| MUC5B+                      | 1.06                | 1.93          | 3.14           | 0.51           | 0.36           | 0.37          | 2.84           | 2.30          |  |
| Myofibroblasts              | 0.09                | 1.69          | 0.38           | 0.42           | 0.07           | 0.15          | 0.81           | 0.37          |  |
| NK Cells                    | 0.04                | 0.06          | 0.37           | 2.73           | 1.24           | 2.90          | 1.33           | 0.17          |  |
| pDCs                        | 0.09                | 0.10          | 0.26           | 0.25           | 0.06           | 0.45          | 0.26           | 0.29          |  |
| Pericytes                   | 0.05                | 0.66          | 0.68           | 0.26           | 0.05           | 1.06          | 0.43           | 0.64          |  |
| Plasma Cells                | 1.07                | 0.55          | 0.45           | 0.30           | 0.37           | 0.88          | 0.39           | 0.48          |  |
| PLIN2+ Fibroblasts          | 0.01                | 0.27          | 0.17           | 0.16           | 0.12           | 0.02          | 0.25           | 0.06          |  |
| PNEC/Ionocytes              | 0.06                | 0.01          | 0.20           | 0.09           | 0.05           | 0.09          | 0.18           | 0.19          |  |
| Proliferating Macrophages   | 1.45                | 1.67          | 0.03           | 0.24           | 0.22           | 0.01          | 0.52           | 0.57          |  |
| Proliferating T Cells       | 0.11                | 0.08          | 0.85           | 0.16           | 0.32           | 0.33          | 0.41           | 0.80          |  |
| SCGB3A2+                    | 2.14                | 2.03          | 2.39           | 0.41           | 0.51           | 0.71          | 2.18           | 2.15          |  |
| SCGB3A2+/SCGB1A1+           | 0.76                | 0.85          | 2.60           | 0.40           | 0.44           | 0.83          | 1.76           | 2.52          |  |
| Smooth Muscle Cells         | 0.24                | 0.85          | 0.58           | 0.15           | 0.19           | 0.33          | 0.48           | 0.45          |  |
| Transitional AT2            | 1.59                | 0.18          | 0.42           | 0.15           | 0.76           | 0.19          | 0.23           | 0.42          |  |
| Vascular Endothelial Cells  | 1.76                | 10.58         | 7.86           | 1.76           | 3.34           | 3.63          | 5.08           | 7.51          |  |
| <b>Total cells</b>          | <b>65,459</b>       | <b>35,415</b> | <b>241,825</b> | <b>268,699</b> | <b>184,852</b> | <b>80,440</b> | <b>265,513</b> | <b>80,593</b> |  |



**Supplementary Table 3b: Cell proportion for each cell type among datasets or diagnosis groups**

| Cell type                   | Cell proportion (%) |               |                |                |                |               |                |               |
|-----------------------------|---------------------|---------------|----------------|----------------|----------------|---------------|----------------|---------------|
|                             | Dataset             |               |                |                | Diagnosis      |               |                |               |
|                             | Northwestern        | Pittsburg     | VUMC/TGen      | Yale/BWH       | Control        | COPD          | IPF            | Other-ILD     |
| AT1                         | 15.34               | 4.02          | 61.90          | 18.75          | 43.57          | 33.22         | 8.91           | 14.31         |
| AT2                         | 40.12               | 1.93          | 48.92          | 9.03           | 57.37          | 6.91          | 18.93          | 16.80         |
| B Cells                     | 4.17                | 1.89          | 25.98          | 67.96          | 14.48          | 23.29         | 55.61          | 6.62          |
| Basal                       | 14.59               | 12.76         | 60.88          | 11.76          | 5.19           | 2.80          | 71.47          | 20.54         |
| CD4 T Cells                 | 8.28                | 6.85          | 43.36          | 41.51          | 21.39          | 25.17         | 43.77          | 9.67          |
| CD8 T Cells                 | 0.07                | 0.25          | 38.92          | 60.76          | 25.04          | 28.03         | 40.99          | 5.94          |
| cDCs                        | 2.31                | 1.99          | 50.57          | 45.13          | 18.74          | 17.22         | 46.20          | 17.83         |
| Ciliated Cells              | 8.13                | 3.51          | 64.98          | 23.38          | 15.28          | 11.76         | 60.32          | 12.64         |
| Fibroblasts                 | 2.01                | 17.80         | 39.30          | 40.89          | 14.09          | 10.46         | 62.27          | 13.19         |
| HAS1 High Fibroblasts       | 1.82                | 16.62         | 51.77          | 29.79          | 21.88          | 5.67          | 59.78          | 12.66         |
| KRT5-/KRT17+                | 2.42                | 3.71          | 74.80          | 19.07          | 3.16           | 5.46          | 69.03          | 22.35         |
| Lymphatic Endothelial Cells | 4.39                | 11.53         | 46.98          | 37.10          | 35.71          | 12.09         | 38.18          | 14.02         |
| Macrophages                 | 9.11                | 6.07          | 27.86          | 56.97          | 34.43          | 12.02         | 41.55          | 12.01         |
| Mast Cells                  | 6.45                | 13.22         | 51.57          | 28.76          | 18.77          | 20.66         | 49.78          | 10.79         |
| Mesothelial                 | 4.65                | 2.52          | 59.95          | 32.88          | 8.09           | 22.50         | 46.30          | 23.11         |
| Monocytes                   | 0.23                | 0.84          | 96.05          | 2.89           | 29.48          | 8.97          | 31.53          | 30.02         |
| MUC5AC+                     | 2.04                | 6.92          | 83.92          | 7.12           | 11.53          | 30.80         | 46.54          | 11.13         |
| MUC5B+                      | 6.69                | 6.60          | 73.42          | 13.29          | 6.38           | 2.85          | 72.87          | 17.90         |
| Myofibroblasts              | 2.08                | 22.23         | 34.11          | 41.57          | 4.71           | 4.42          | 79.84          | 11.02         |
| NK Cells                    | 0.30                | 0.25          | 10.81          | 88.64          | 27.60          | 28.13         | 42.67          | 1.61          |
| pDCs                        | 4.44                | 2.58          | 45.23          | 47.74          | 7.46           | 26.16         | 49.53          | 16.85         |
| Pericytes                   | 1.31                | 8.97          | 63.16          | 26.56          | 3.43           | 32.68         | 44.19          | 19.71         |
| Plasma Cells                | 25.00               | 6.94          | 38.91          | 29.15          | 24.14          | 25.21         | 36.77          | 13.88         |
| PLIN2+ Fibroblasts          | 0.62                | 9.99          | 43.81          | 45.58          | 23.31          | 1.46          | 70.14          | 5.10          |
| PNEC/Ionocytes              | 5.10                | 0.51          | 62.50          | 31.89          | 11.10          | 9.44          | 60.20          | 19.26         |
| Proliferating Macrophages   | 41.98               | 26.26         | 3.23           | 28.52          | 18.20          | 0.44          | 61.12          | 20.24         |
| Proliferating T Cells       | 2.90                | 1.04          | 78.99          | 17.07          | 22.98          | 10.39         | 41.64          | 24.99         |
| SCGB3A2+                    | 15.51               | 7.99          | 64.19          | 12.31          | 10.42          | 6.30          | 64.08          | 19.20         |
| SCGB3A2+/SCGB1A1+           | 6.12                | 3.70          | 76.87          | 13.31          | 9.88           | 8.17          | 57.06          | 24.89         |
| Smooth Muscle Cells         | 7.04                | 13.36         | 61.73          | 17.88          | 15.31          | 11.81         | 56.77          | 16.11         |
| Transitional AT2            | 41.27               | 2.53          | 39.76          | 16.44          | 55.80          | 6.06          | 24.67          | 13.47         |
| Vascular Endothelial Cells  | 4.02                | 13.09         | 66.35          | 16.54          | 21.54          | 10.19         | 47.14          | 21.14         |
| <b>Total cells</b>          | <b>65,459</b>       | <b>35,415</b> | <b>241,825</b> | <b>268,699</b> | <b>184,852</b> | <b>80,440</b> | <b>265,513</b> | <b>80,593</b> |

**Supplementary Table 4: *ACE2*<sup>+</sup> vs. *ACE2*<sup>-</sup> CLD AT2 unique genes**

| GeneName | p_val    | avg_log2FC   | pct.1 | pct.2 | p_val_adj   |
|----------|----------|--------------|-------|-------|-------------|
| SFTPA1   | 4.03E-09 | 0.578156076  | 0.94  | 0.881 | 0.000191942 |
| SFTPD    | 1.56E-08 | 0.451851465  | 0.909 | 0.757 | 0.000745609 |
| ACSL4    | 2.19E-08 | 0.400087955  | 0.614 | 0.468 | 0.001043338 |
| TFPI     | 2.66E-08 | 0.494254003  | 0.705 | 0.553 | 0.001265523 |
| ADGRF5   | 2.96E-08 | 0.373739604  | 0.79  | 0.649 | 0.001412447 |
| HHIP     | 4.56E-08 | 0.588375405  | 0.636 | 0.43  | 0.002172491 |
| LPCAT1   | 4.83E-08 | 0.37670078   | 0.884 | 0.748 | 0.002303051 |
| DHCR24   | 6.43E-08 | 0.293833821  | 0.901 | 0.782 | 0.003065095 |
| DMBT1    | 7.60E-08 | 0.636001537  | 0.628 | 0.447 | 0.003622058 |
| CPB2     | 1.53E-07 | 0.292152883  | 0.352 | 0.197 | 0.007275621 |
| PRDX5    | 3.50E-07 | -0.301825135 | 0.963 | 0.954 | 0.016661234 |
| TMEM191C | 4.62E-07 | 0.111689942  | 0.151 | 0.066 | 0.022033042 |
| TSPAN1   | 4.93E-07 | -0.58961901  | 0.173 | 0.307 | 0.023506553 |
| ABCA3    | 6.65E-07 | 0.415711847  | 0.852 | 0.68  | 0.031713974 |
| NPC2     | 8.30E-07 | 0.28895014   | 0.986 | 0.979 | 0.039565458 |
| CACNA2D2 | 9.74E-07 | 0.317392333  | 0.668 | 0.485 | 0.046403494 |
| KCNJ15   | 9.97E-07 | 0.300923175  | 0.628 | 0.424 | 0.047529834 |
| CRTAC1   | 1.04E-06 | 0.3164135    | 0.514 | 0.346 | 0.04966531  |
| MYL6     | 1.48E-06 | -0.238926251 | 0.952 | 0.974 | 0.070506091 |
| PGC      | 1.53E-06 | 0.470976088  | 0.827 | 0.685 | 0.073129647 |

**Supplementary Table 5: Top 20 enriched GO terms of the significant *ACE2* correlated gene set in the CLD AT2 cells using Kolmogorov-Smirnov (KS) statistic test, q-value is the Benjamini-Hochberg corrected p-value**

| GO.ID      | Term                                                                             | Annotated | Significant | Expected | p_value  | q_value  |
|------------|----------------------------------------------------------------------------------|-----------|-------------|----------|----------|----------|
| GO:0070125 | mitochondrial translational elongation                                           | 88        | 0           | 0.58     | 1.20E-12 | 0        |
| GO:0070126 | mitochondrial translational termination                                          | 89        | 0           | 0.59     | 5.20E-12 | 0        |
| GO:0006406 | mRNA export from nucleus                                                         | 111       | 1           | 0.73     | 2.30E-09 | 0        |
| GO:0006364 | rRNA processing                                                                  | 188       | 1           | 1.24     | 3.00E-08 | 1.00E-04 |
| GO:0043488 | regulation of mRNA stability                                                     | 169       | 1           | 1.11     | 3.40E-08 | 1.00E-04 |
| GO:0000209 | protein polyubiquitination                                                       | 313       | 2           | 2.06     | 4.30E-08 | 1.00E-04 |
| GO:0015031 | protein transport                                                                | 1733      | 7           | 11.42    | 6.70E-08 | 1.00E-04 |
| GO:0042795 | snRNA transcription by RNA polymerase II                                         | 68        | 1           | 0.45     | 1.90E-07 | 4.00E-04 |
| GO:0016032 | viral process                                                                    | 798       | 5           | 5.26     | 2.60E-07 | 4.00E-04 |
| GO:0000398 | mRNA splicing, via spliceosome                                                   | 346       | 0           | 2.28     | 2.80E-07 | 4.00E-04 |
| GO:0016579 | protein deubiquitination                                                         | 254       | 0           | 1.67     | 4.80E-07 | 7.00E-04 |
| GO:0032981 | mitochondrial respiratory chain complex I assembly                               | 59        | 0           | 0.39     | 6.20E-07 | 8.00E-04 |
| GO:0006120 | mitochondrial electron transport, NADH to ubiquinone                             | 47        | 0           | 0.31     | 1.10E-06 | 0.0013   |
| GO:0006281 | DNA repair                                                                       | 520       | 3           | 3.43     | 3.10E-06 | 0.0032   |
| GO:0016567 | protein ubiquitination                                                           | 767       | 4           | 5.05     | 3.40E-06 | 0.0032   |
| GO:0006886 | intracellular protein transport                                                  | 1029      | 4           | 6.78     | 3.40E-06 | 0.0032   |
| GO:0032436 | positive regulation of proteasomal ubiquitin-dependent protein catabolic process | 84        | 0           | 0.55     | 3.50E-06 | 0.0032   |
| GO:0090090 | negative regulation of canonical Wnt signaling pathway                           | 165       | 2           | 1.09     | 4.20E-06 | 0.0036   |
| GO:0006368 | transcription elongation from RNA polymerase II promoter                         | 80        | 0           | 0.53     | 4.40E-06 | 0.0036   |
| GO:0006367 | transcription initiation from RNA polymerase II promoter                         | 176       | 1           | 1.16     | 6.10E-06 | 0.0047   |

## SUPPLEMENTARY FIGURES

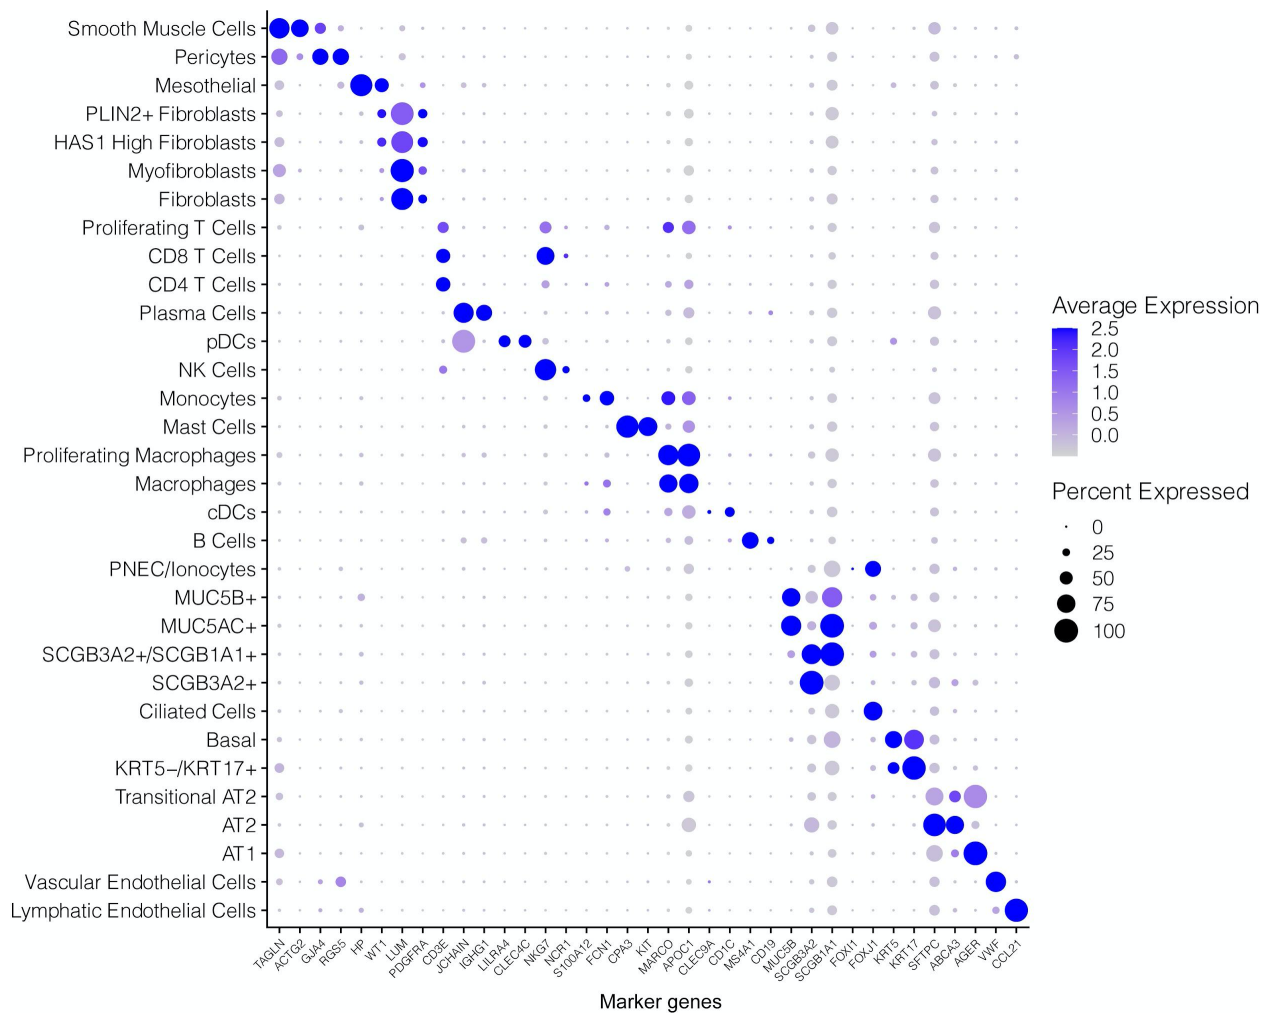

**Supplementary Fig 1:** Dotplot shows ubiquitous scaled expression of cell type specific marker genes used in cell type annotation of Seurat clusters. The intensity of the dots represents average expression levels of the marker genes in each cell type, while the size of the dots represents the percentage of cells expressing the corresponding marker in each cell type.

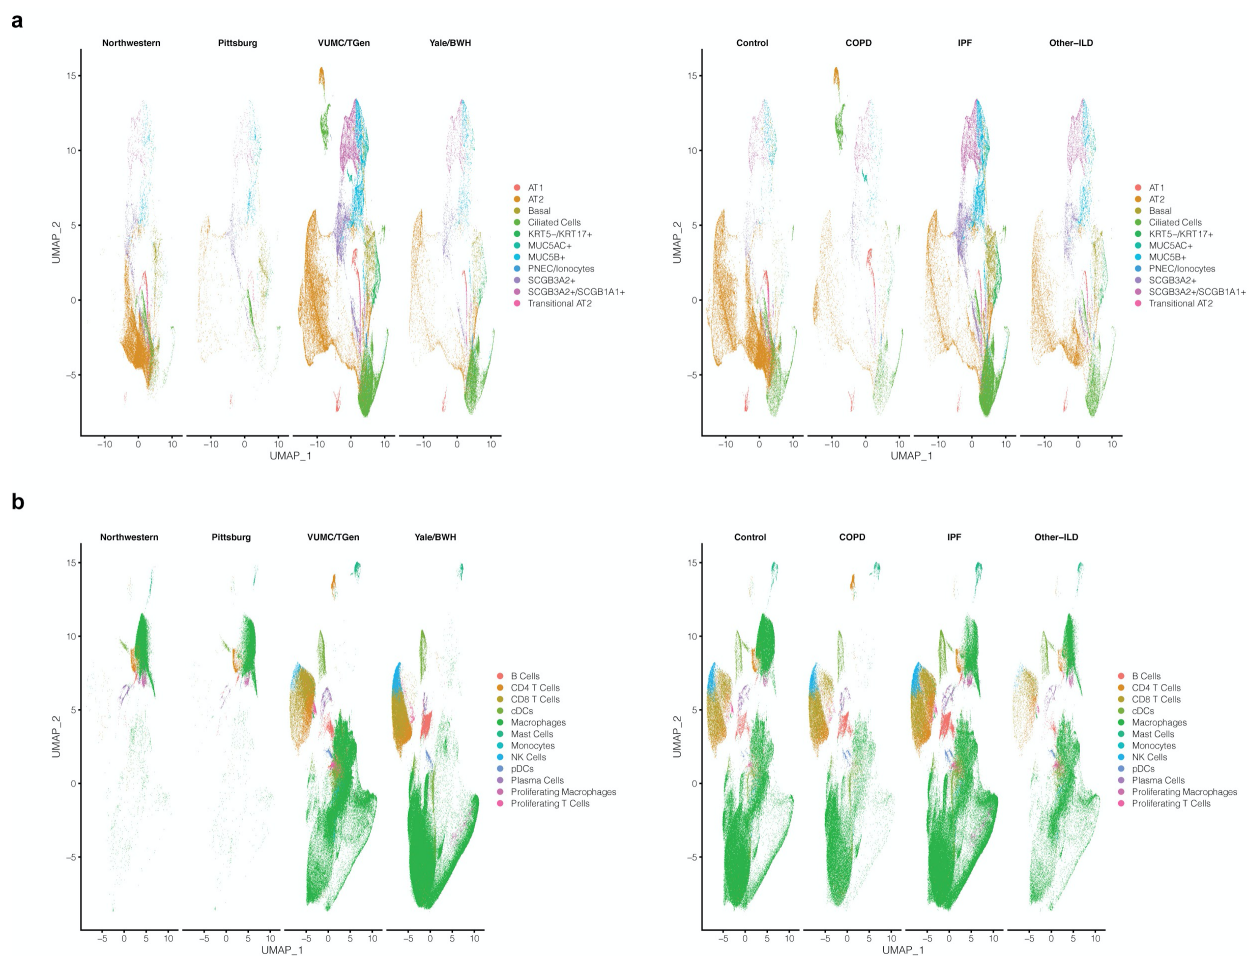

**Supplementary Fig 2:** UMAP plots display cell type distribution between dataset and diagnosis groups in (a) the epithelial and (b) the immune cell population.

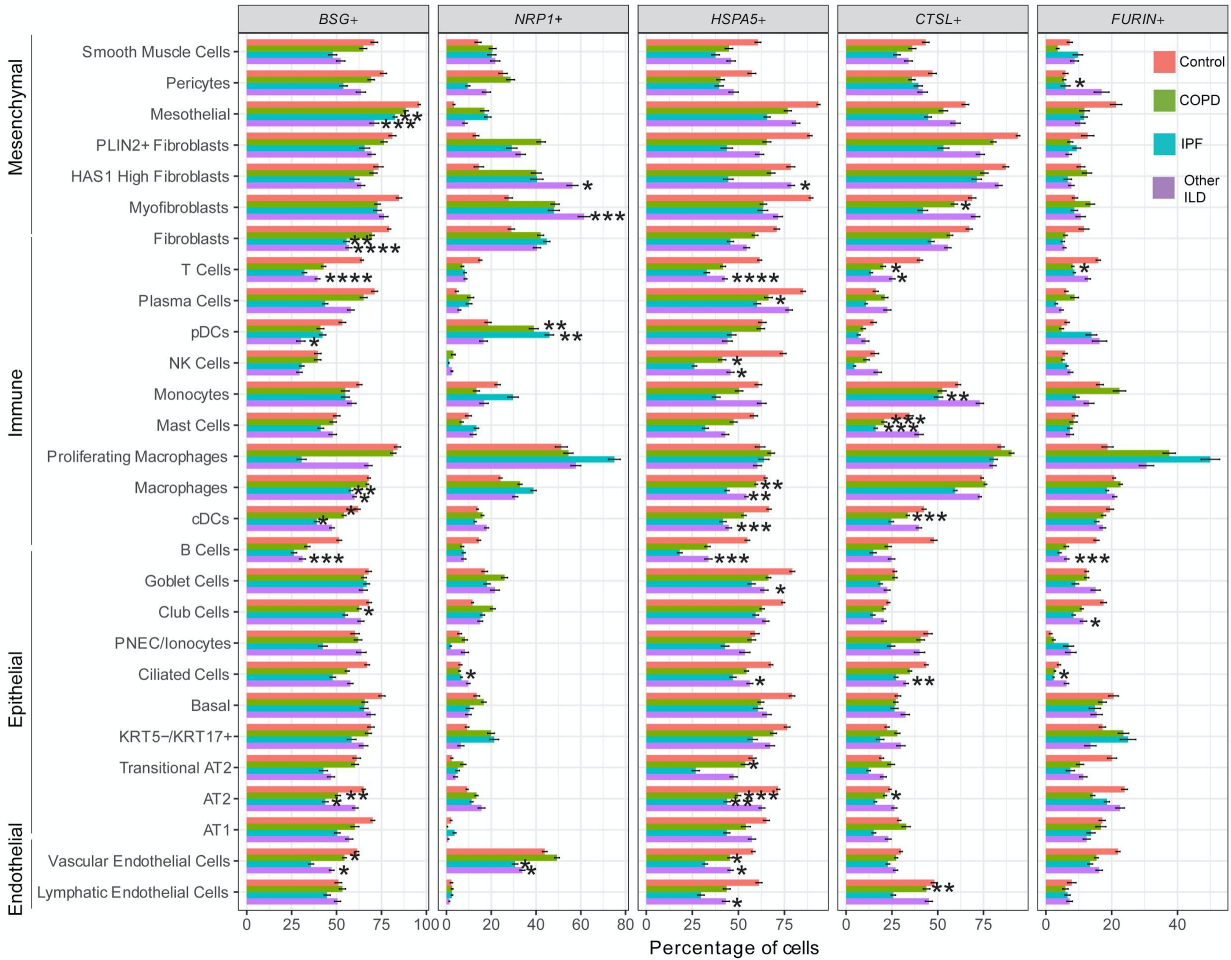

**Supplementary Fig 3:** Percentage of single positive cells for *BSG* (*CD147*), *NRPI*, *HSPA5* (*GRP78*), *CTSL* and *FURIN* in different chronic lung disease groups per cell type. Plots were generated with mean values of percentage of cells per individual samples, and bars display the standard errors. Tukey\_HSD post-hoc statistical test showed significant differences between each diagnosis subgroup and control samples, p-value < 0.05: \*, p-value < 0.01: \*\*, p-value < 0.001: \*\*\*, p-value < 0.0001: \*\*\*\*

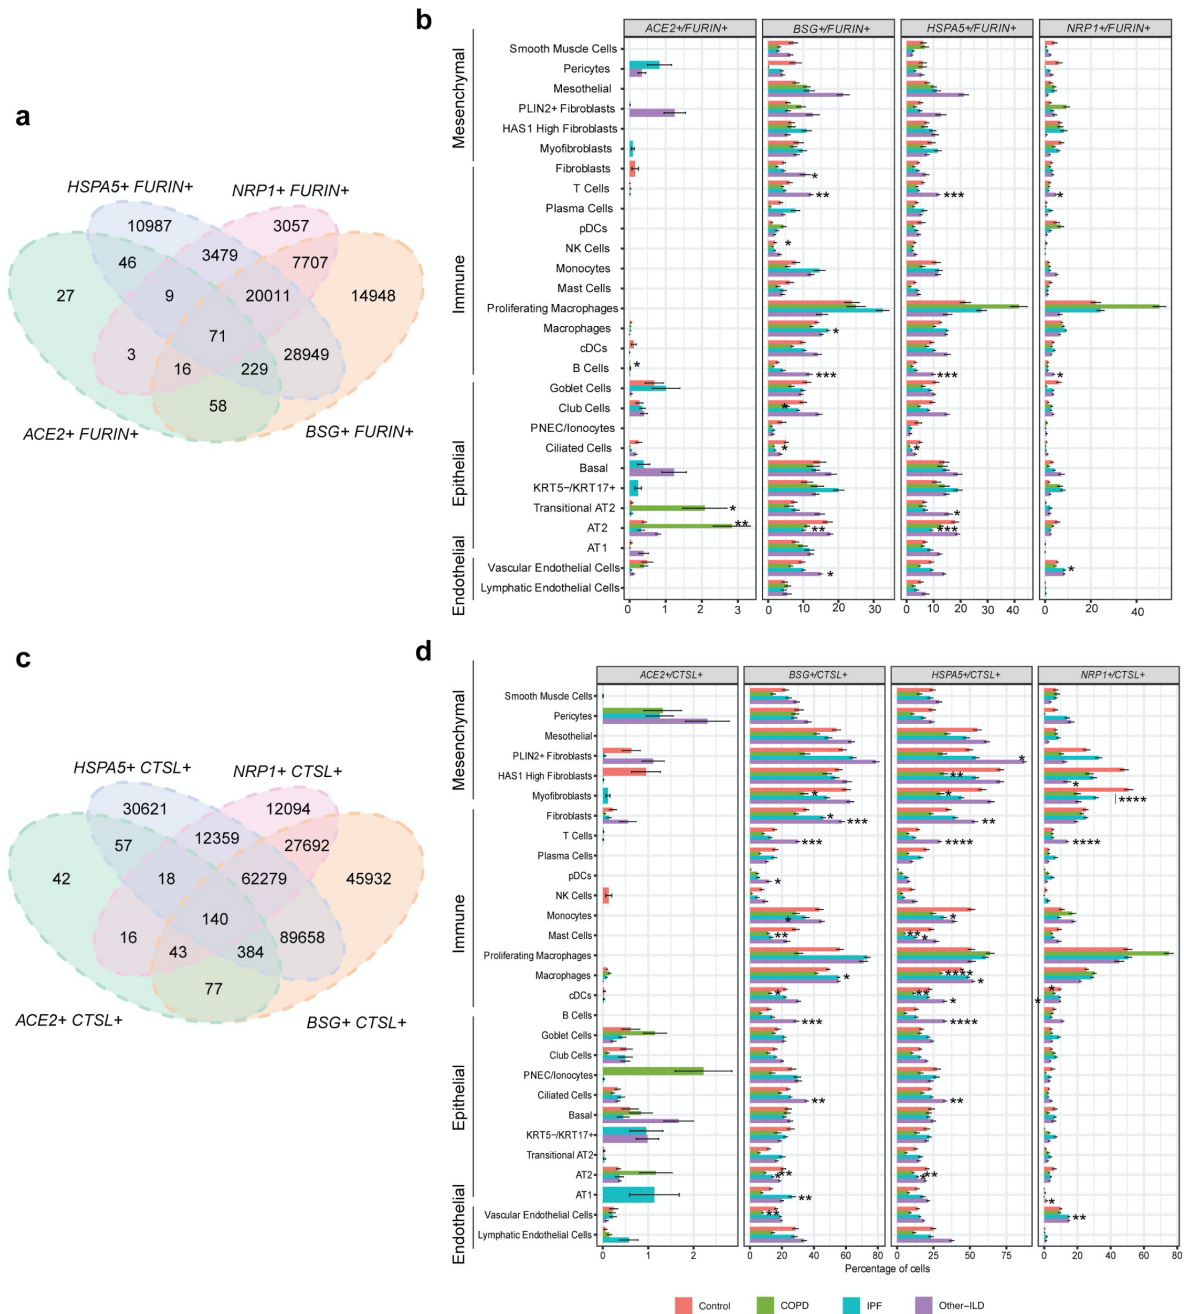

**Supplementary Fig 4:** Percentage of double positive cells: **(a-b)** *ACE2+ FURIN+*, *BSG+ FURIN+*, *HSPA5+ FURIN+*, *NRP1+ FURIN+* and **(c-d)** *ACE2+ CTSL+*, *BSG+ CTSL+*, *HSPA5+ CTSL+*, *NRP1+ CTSL+* in different chronic lung disease groups per cell type. Plots were generated with mean values of percentage of cells per individual samples, and bars display the standard errors. Tukey\_HSD post-hoc statistical test, p-value < 0.05: \*, p-value < 0.01: \*\*, p-value < 0.001: \*\*\*, p-value < 0.0001: \*\*\*\*

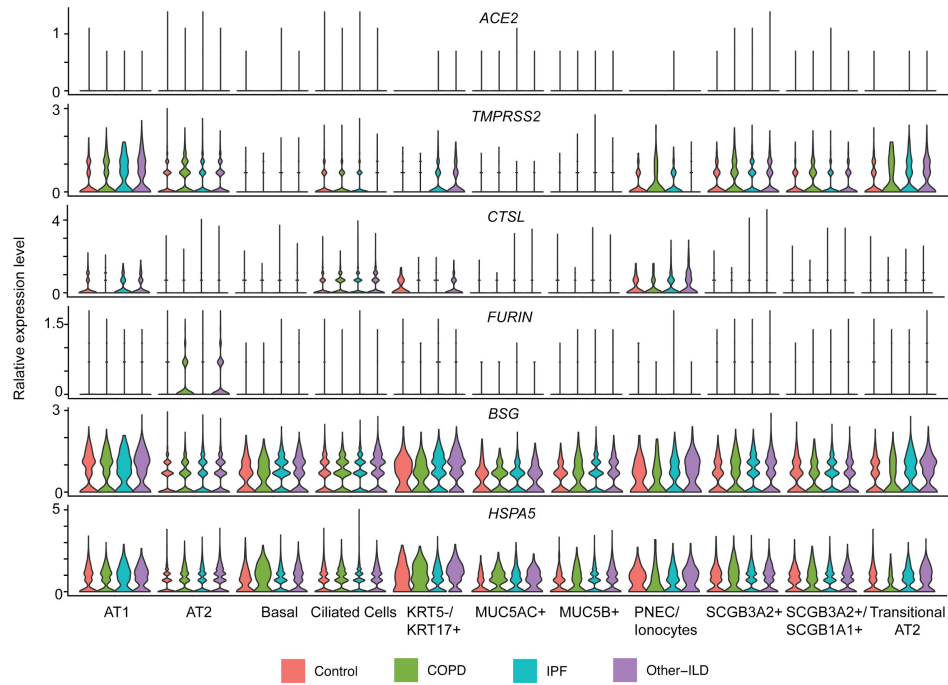

**Supplementary Fig 5:** Gene expression analysis for SARS-CoV-2 entry mediators in the epithelial cell population.



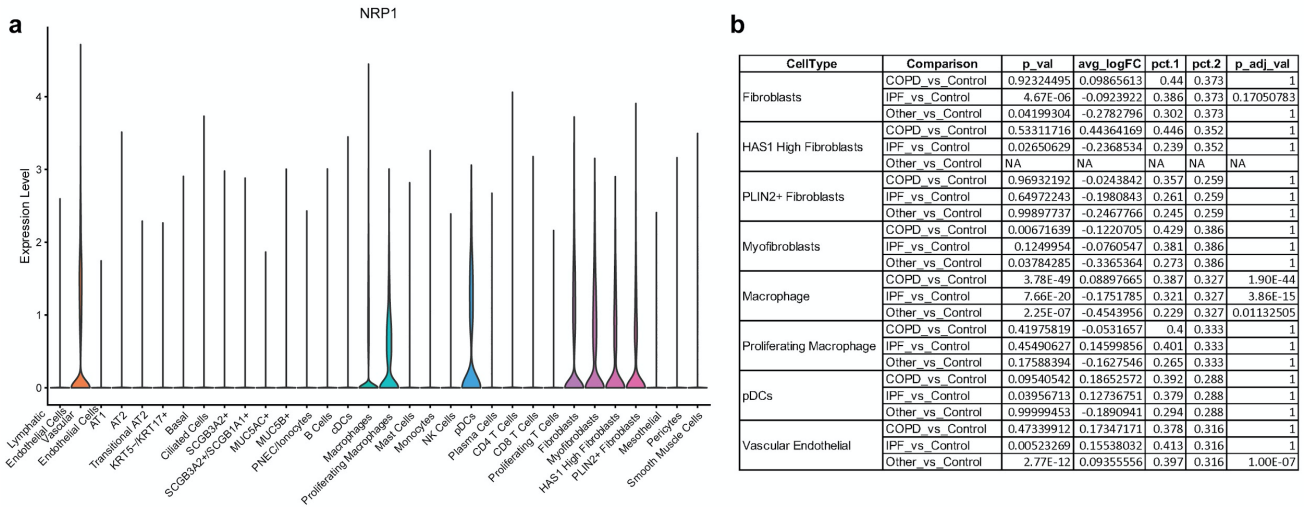

**Supplementary Fig 6:** Expression of the putative SARS-CoV-2 receptor, *NRPI*, in the data set. **(a)** Violin plot shows high expression of *NRPI* in some cell types. **(b)** Differential expression analysis of *NRPI* in different disease groups vs. control samples for the cell types having high *NRPI* expression in **(a)**. The differential expression analysis was performed using the Seurat FindMarkers function with the four covariates (dataset, age, ethnicity, smoking\_status) incorporated into the negative binomial model (as described in the Methods section).

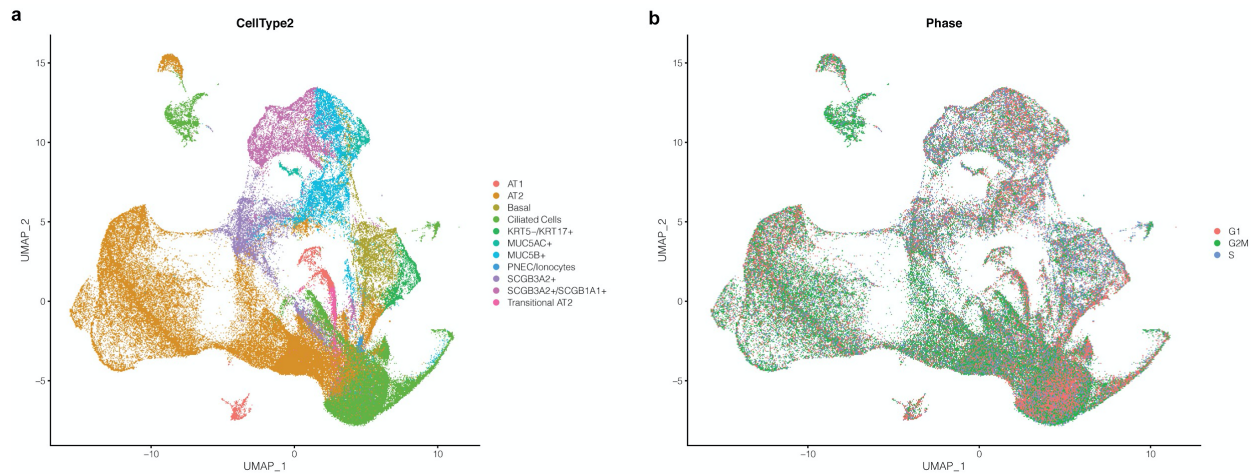

**Supplementary Fig 7:** UMAP plot shows distribution of cell cycle state across all epithelial cells.



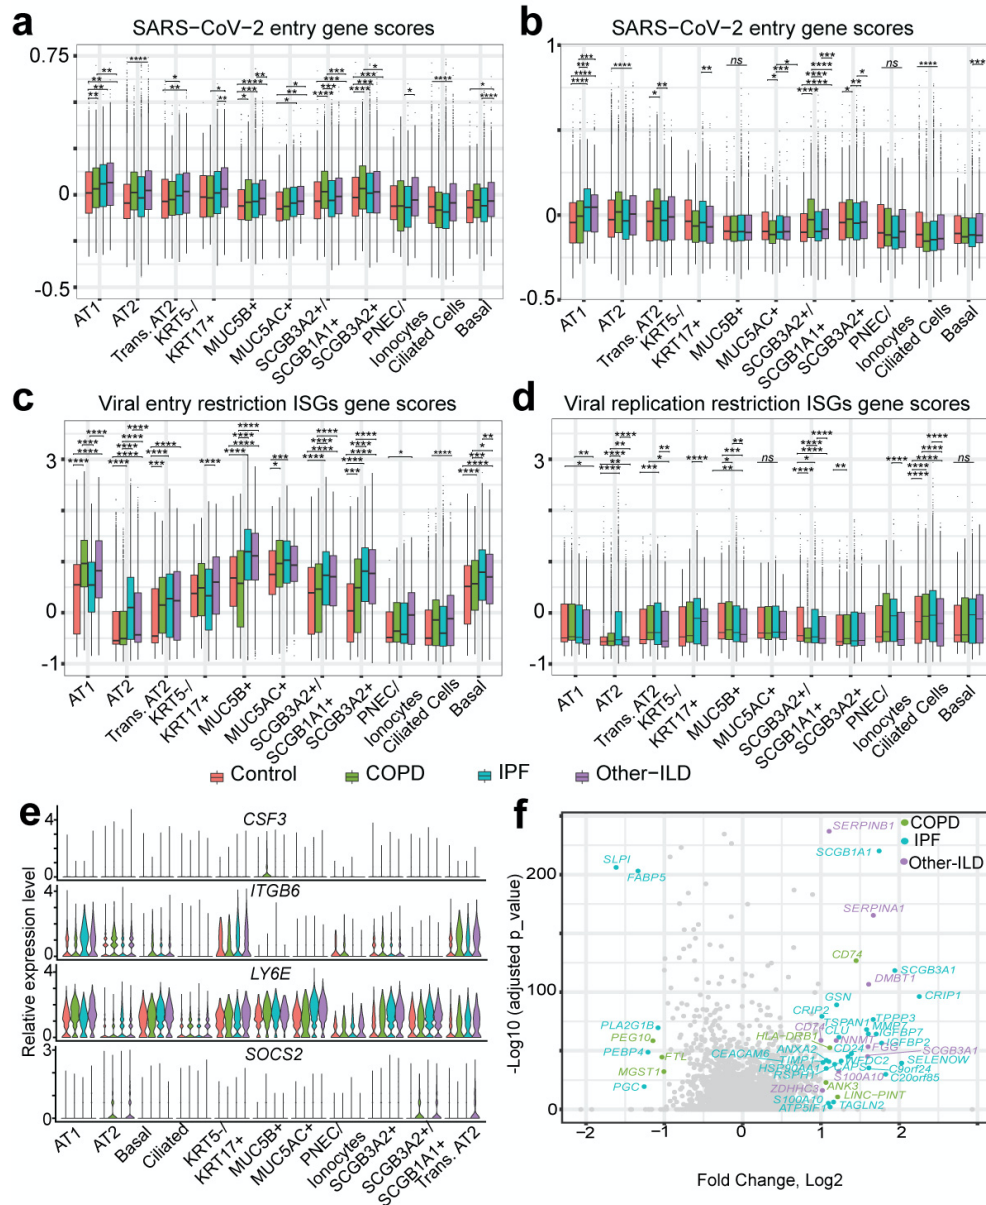

**Supplementary Fig 8:** SARS-Cov-2 entry genes scores with all outliers included. **(a)** Gene set 1 (*ACE2*, *BSG*, *HSPA5*, *TMPRSS2*, *CTSL*, *FURIN*, *ADAM17*). **(b)** Gene set 2 (*ACE2*, *TMPRSS2*, *CTSL*, *FURIN*, *ADAM17*). **(c)** Viral entry restriction ISGs gene module scores. **(d)** Viral replication restriction ISGs gene module scores. **(e)** Violin plot shows expression of genes in Figure 2d with all epithelial cell types. **(f)** Volcano plot highlights genes differentially expressed in the AT2 cells between different disease groups and control. Boxes: interquartile range, lower and upper hinges correspond to the first and third quartiles, upper and lower whisker extends from the hinge to the largest values or smallest values of 1.5 x interquartile range **(a)** to **(d)**: Tukey\_HSD post-hoc statistical test, p-value < 0.05: \*, p-value < 0.01: \*\*, p-value < 0.001: \*\*\*, p-value < 0.0001: \*\*\*\*.

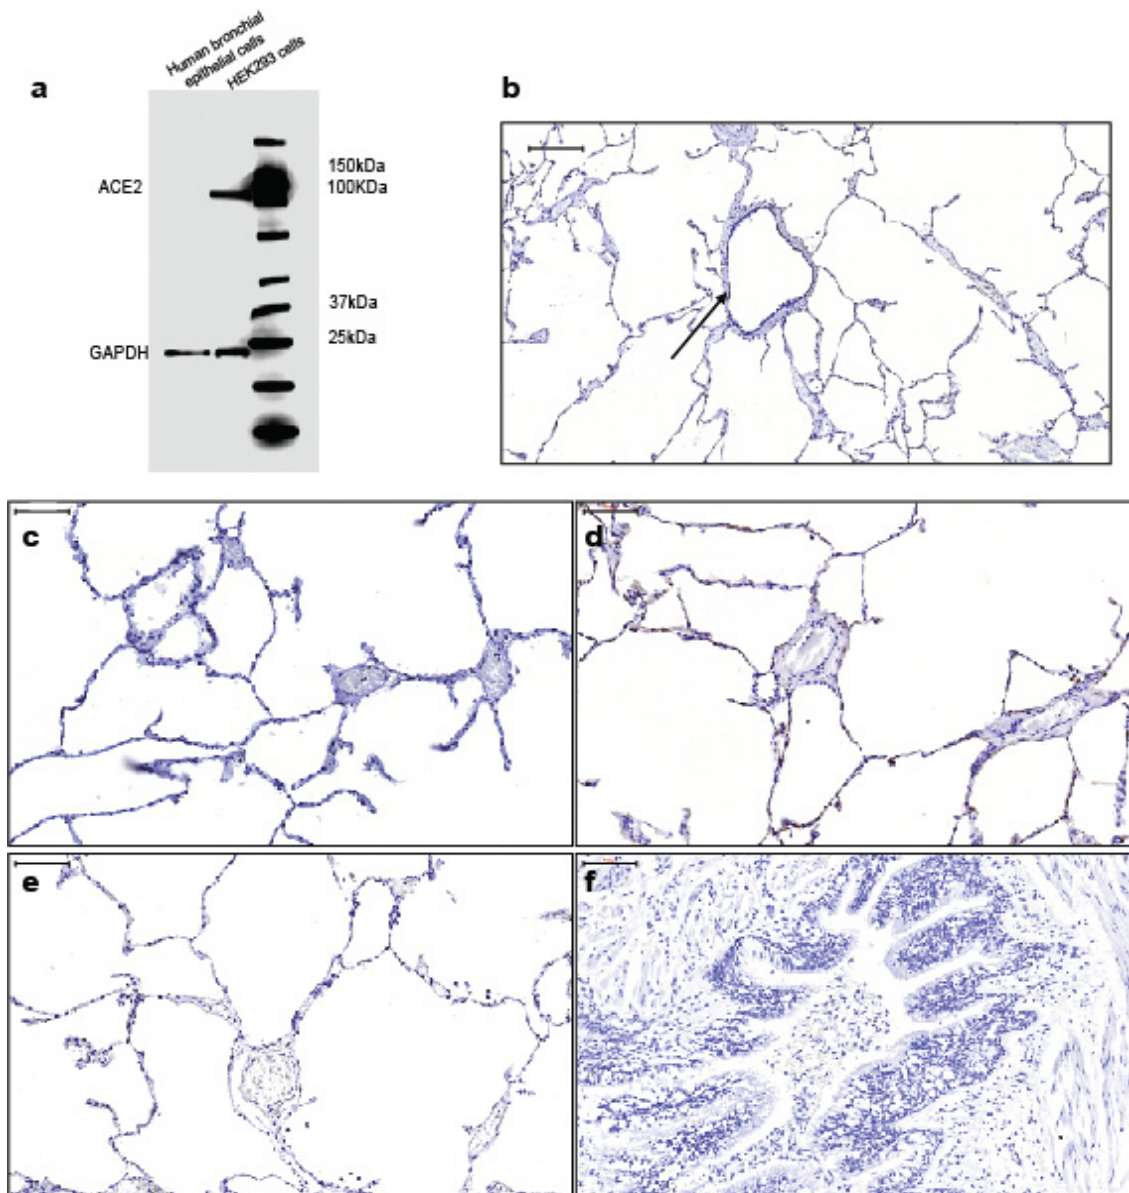

**Supplementary Fig 9:** Representative sections of control lung sections are shown with each immunomarker. (a) Western blotting image showing a single band for ACE2 (ab108252) in the human embryonic kidney HEK293 cells, but not in the human bronchial epithelial cells, at the predicted molecular weight of 100kDa, GAPDH (ab8245) was used as a loading control at 23kDa. ACE2 staining of the small airway (arrow) (b) and the alveolar parenchyma (c) in the control lung. (d)  $\alpha 6 \beta 6$  staining in the alveolar parenchyma in the control lung. (e-f) Secondary antibody controls for control (e) and IPF section (f); Scale bars=100  $\mu$ m. A total of 12 normal lung samples and 62 IPF samples were used for the immunohistochemistry analysis.

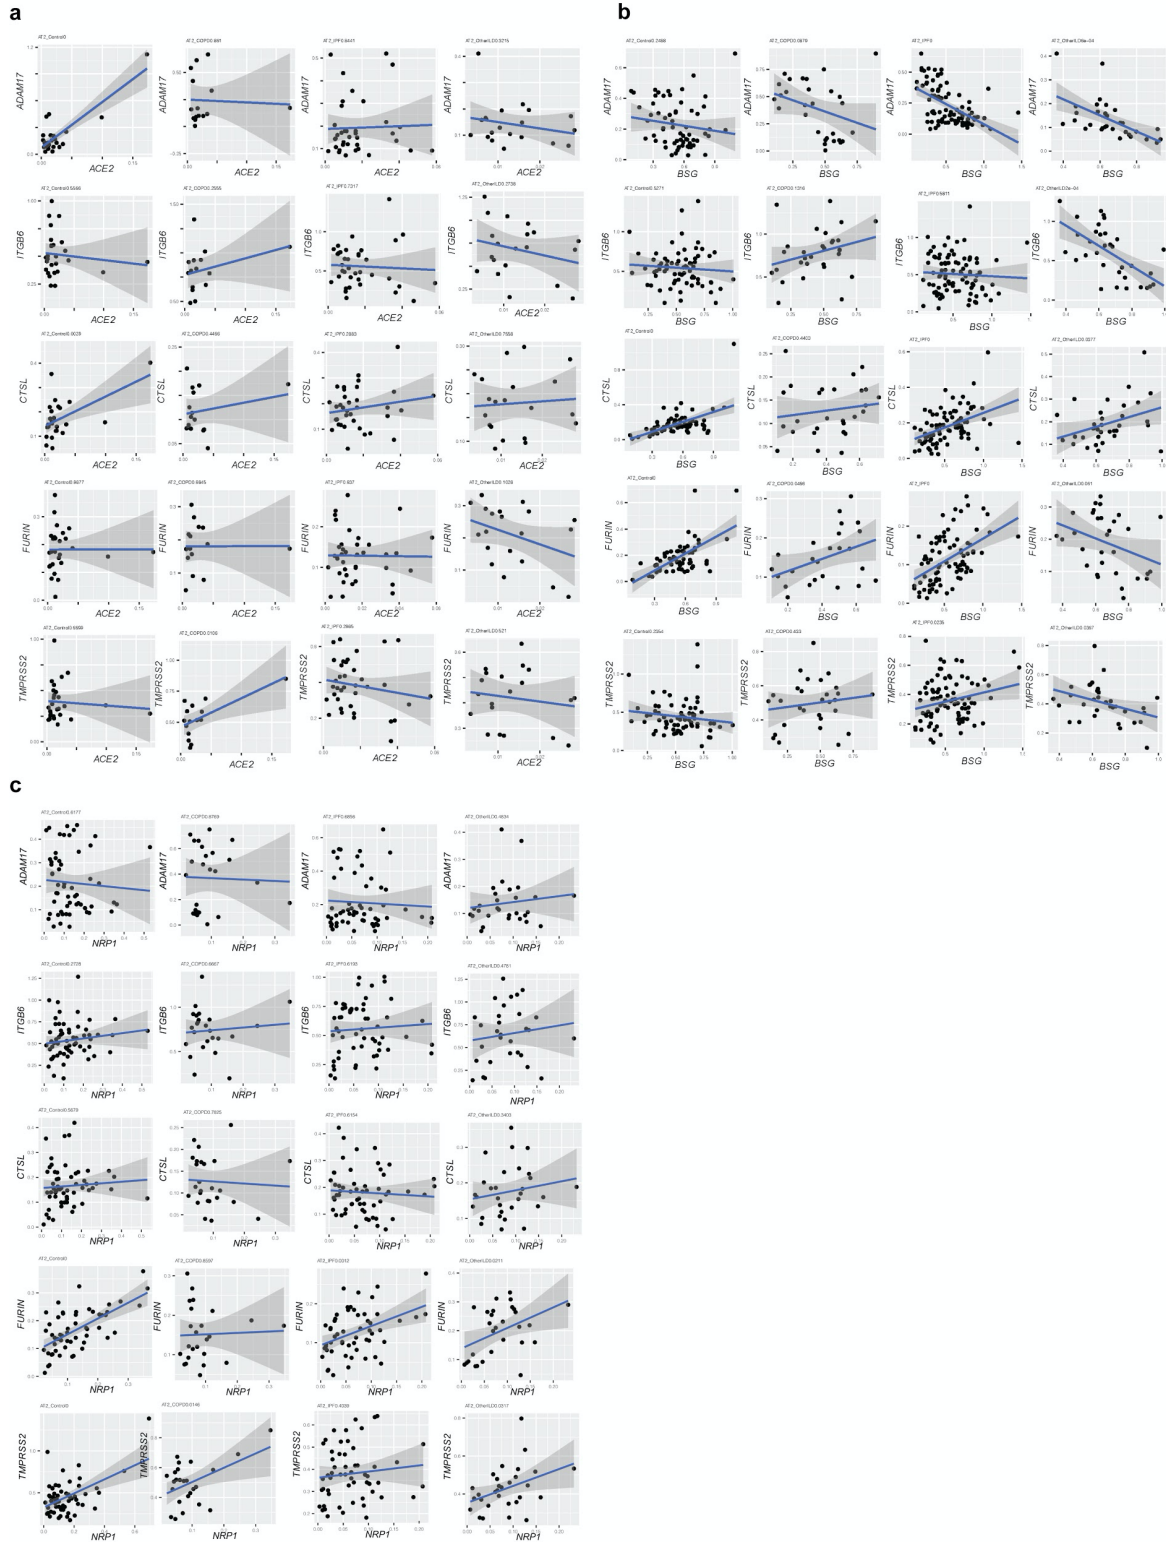

**Supplementary Fig 10:** Gene expression correlation between SARS-CoV-2 mediators and proteases in the AT2 cell types. (a) Gene correlation with *ACE2*. (b) Gene correlation with *BSG* (*CD147*). (c) Gene correlation with *NRP1*.

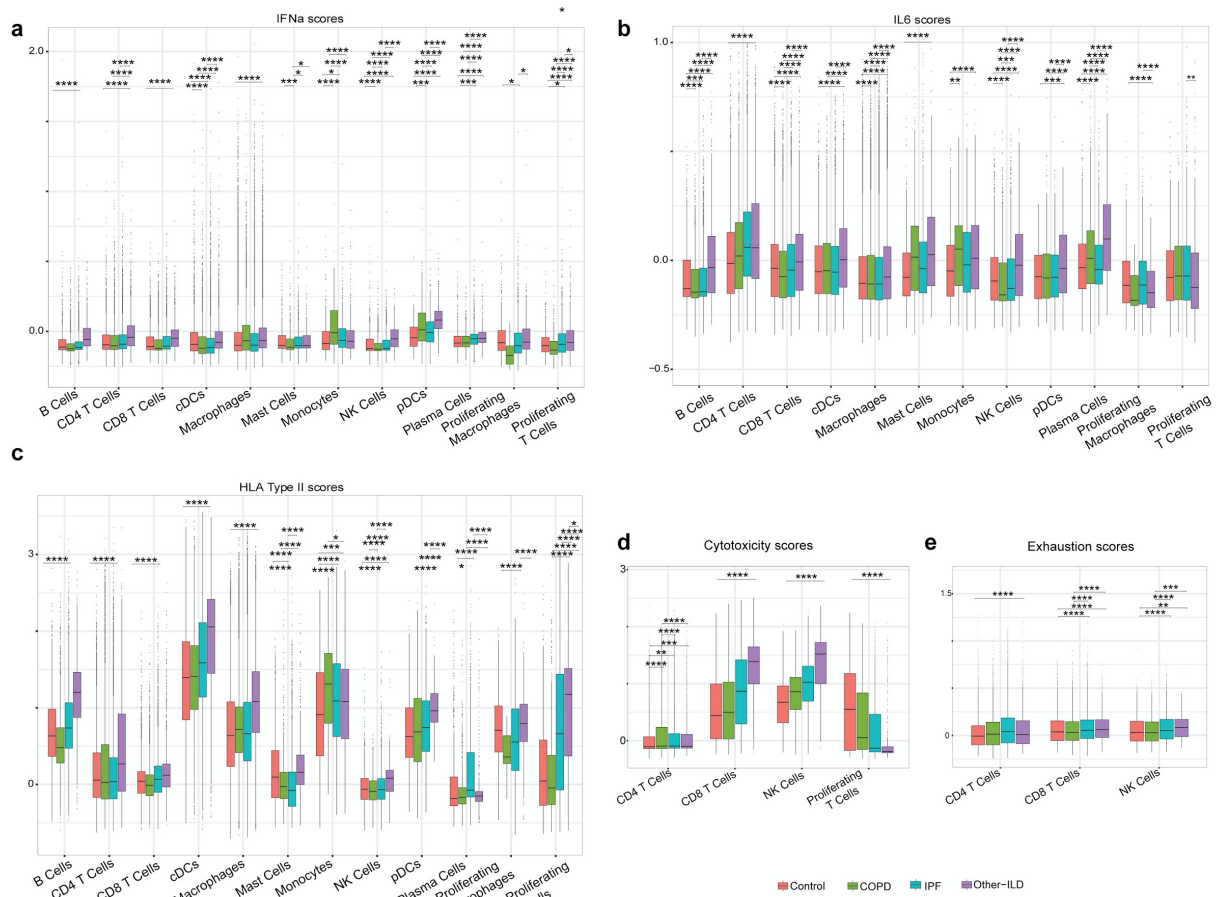

**Supplementary Fig 11:** Differences in module scores of IFNa (a), IL6 (b) and HLA type II (c) genes in the immune population in different disease groups. (d-e) Cytotoxic scores and exhaustion scores in the T cell population in different disease groups. (b), (d), (e) are the same plots as in Fig. 3d-f, but included outliers. Y-axis: gene module score calculated by Seurat AddModuleScore function. Boxes: interquartile range, lower and upper hinges correspond to the first and third quantiles, upper and lower whisker extends from the hinge to the largest values or smallest values of 1.5 x interquartile range. Tukey\_HSD post-hoc statistical test, p-value < 0.05: \*, p-value < 0.01: \*\*, p-value < 0.001: \*\*\*, p-value < 0.0001: \*\*\*\*



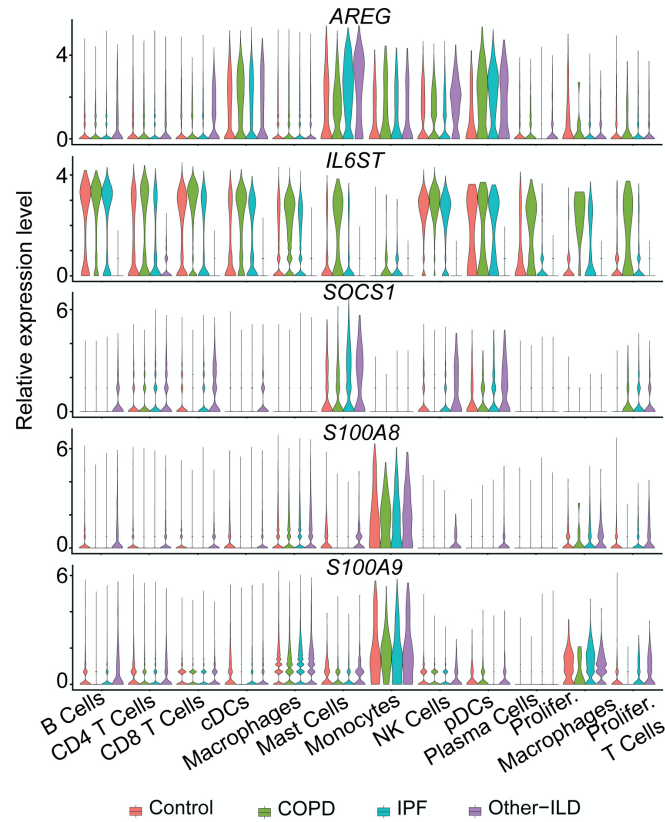

**Supplementary Fig 12:** Violin plots depict gene expression differences of SARS-CoV-2 immune response genes: *AREG*, *IL6ST*, *SOCS1*, *S100A8* and *S100A9* in all immune cells.
